# Supplementary material
Source: publisher figshare collection journal article supplement (https://tandf.figshare.com/articles/dataset/_/9860687)

# Animals in the Oikonyms of Lithuania

1:500 000

0 10 20 40 km

The map shows 1021 inhabited places of Lithuania that have names associated with the names of animals. It is a part of map project developed for visual and statistical analysis of the spatial distribution of the toponyms and their relationship with the characteristics of the natural environment.

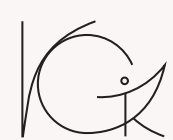

VILNIUS UNIVERSITY DEPARTMENT FOR  
CARTOGRAPHY AND GEOINFORMATICS  
OF THE INSTITUTE OF GEOSCIENCES

## Authors

Giedrė Beconytė (project leader), Julius Donatas Budrevičius,  
Ugnė Andriulaitė, Irina Kaminskaitė, Dovydas Pajarskas,  
Julius Pašukonis, Vaida Petrauskaitė, Raimonda Skapaitė,  
Kęstutis Vaišnys and Lukas Zmejevskis.

Lithuanian coordinate system LKS-94

Designed for printing at 594 x 841 mm (ISO A1)

© Journal of Maps, 2019

## OIKONYMS ASSOCIATED WITH ANIMAL NAMES AND OVERALL DISTRIBUTION OF SETTLEMENTS

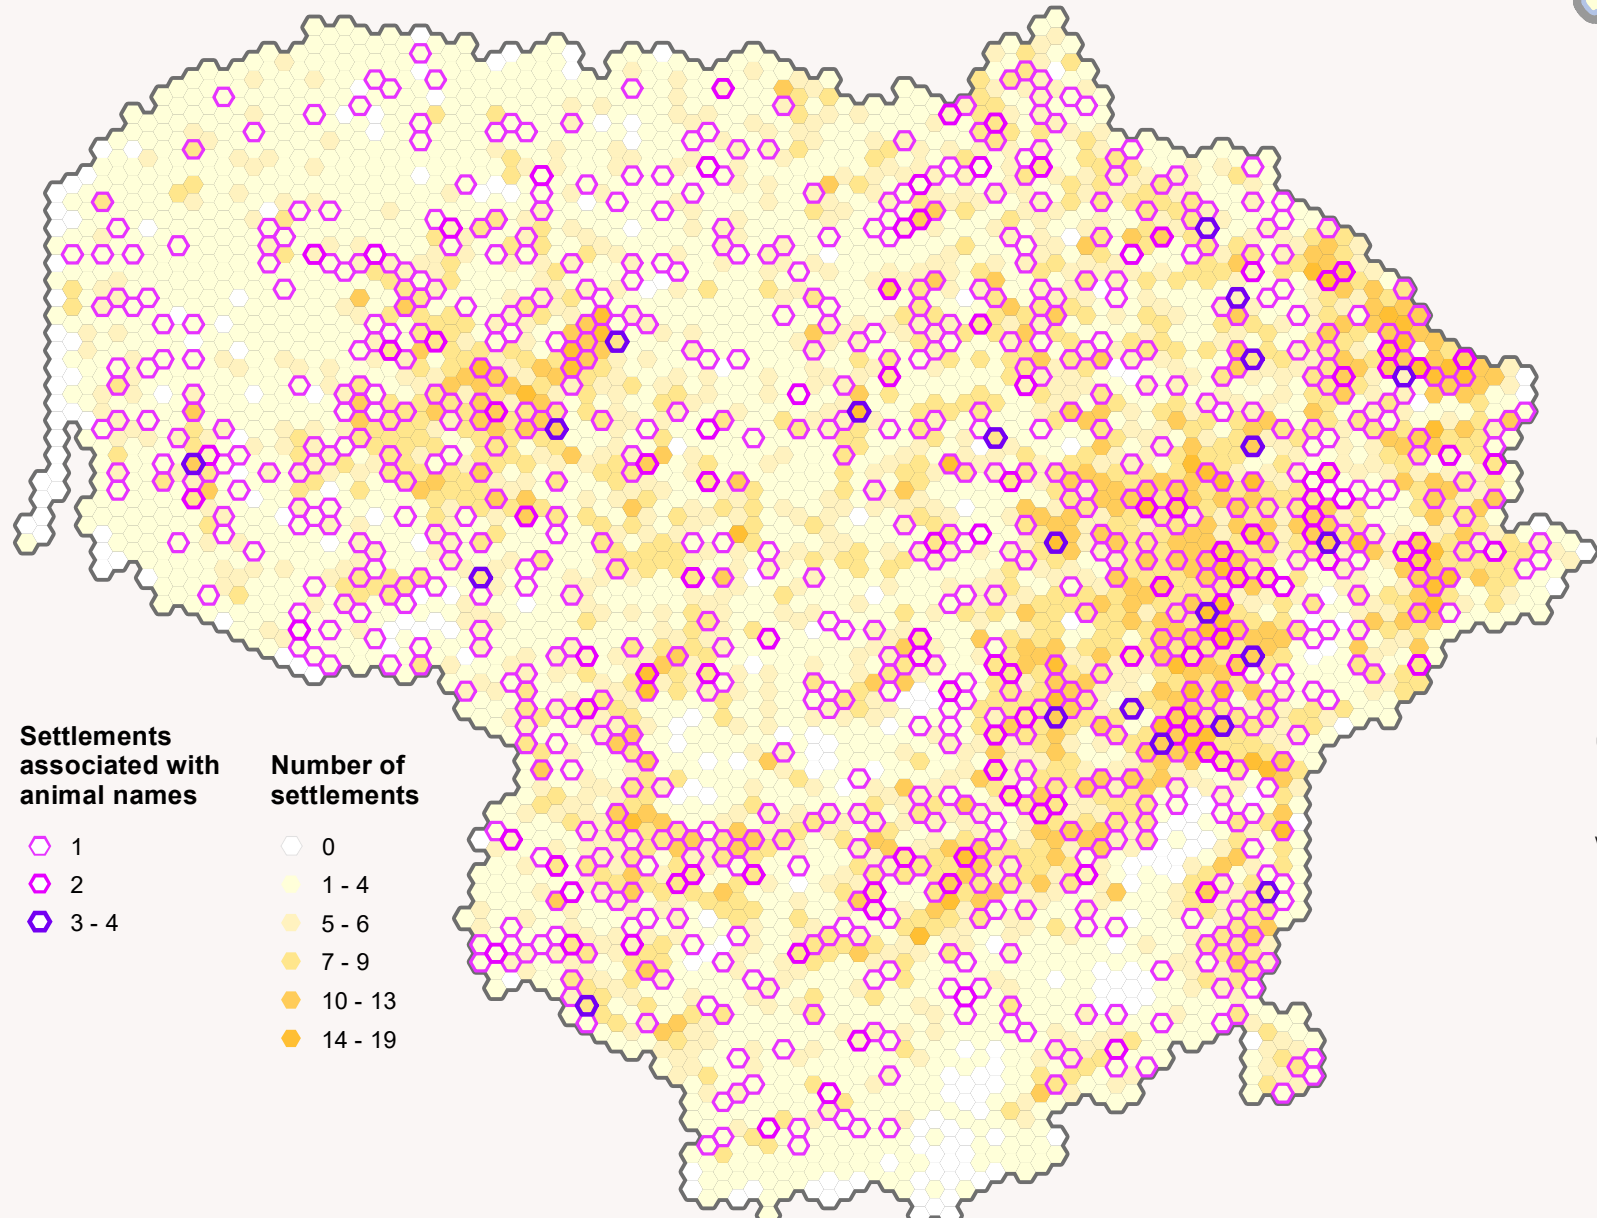

Settlements  
associated with  
animal names

Number of  
settlements

0  
1 - 4  
5 - 6  
7 - 9  
10 - 13  
14 - 19

All oikonyms  
21171

1021

2332

442

437

Oikonyms that associate with names of animals, plants and fungi

Oikonyms that associate with names of animals

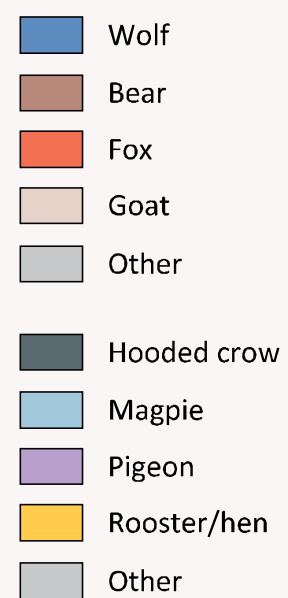

Supplement: Supplementary file 1 [file 1]
